# Supplementary material for: Computationally designed sensors detect endogenous Ras activity and signaling effectors at subcellular resolution
Source: PubMed Central journal article supplement (PMC11631767; doi:10.1038/s41587-023-02107-w), 2024-01-25

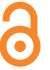

---

# Computationally designed sensors detect endogenous Ras activity and signaling effectors at subcellular resolution

---

In the format provided by the authors and unedited

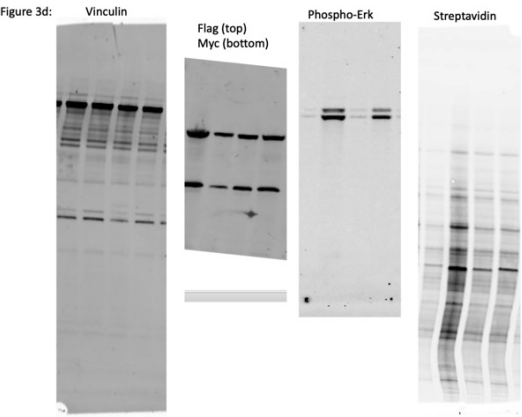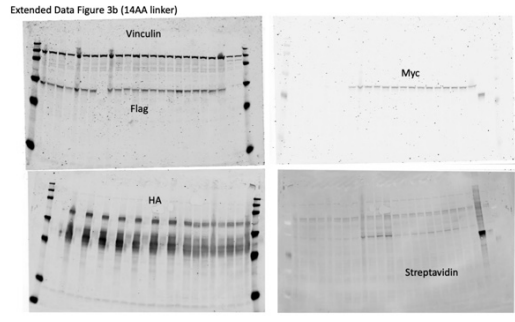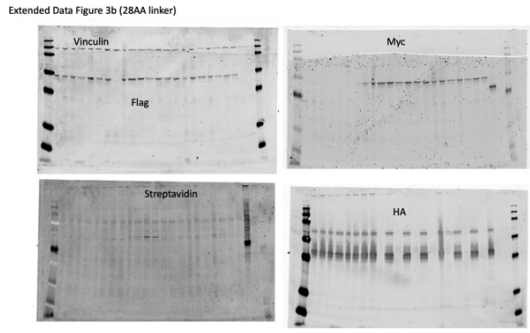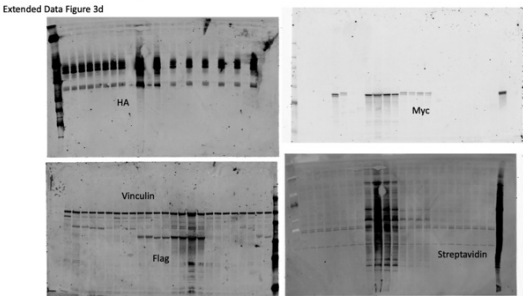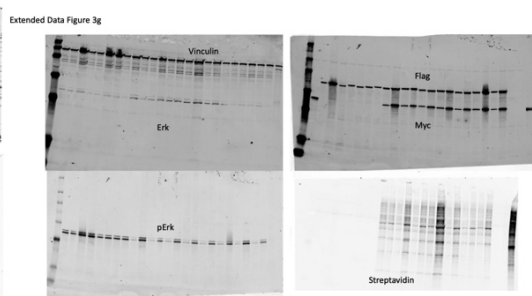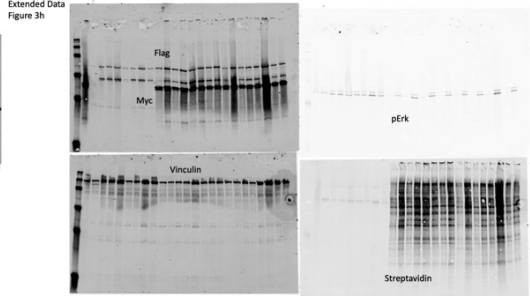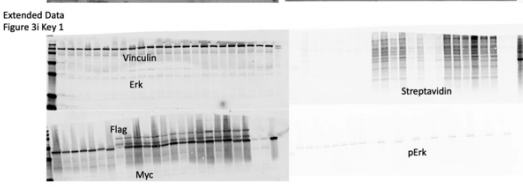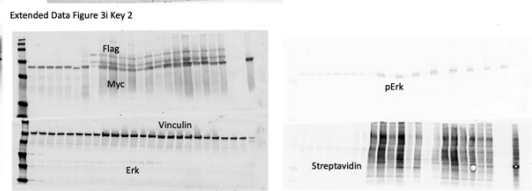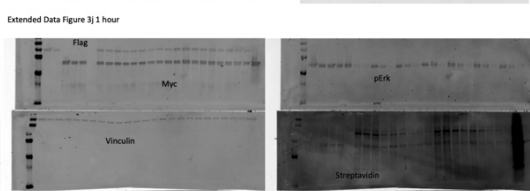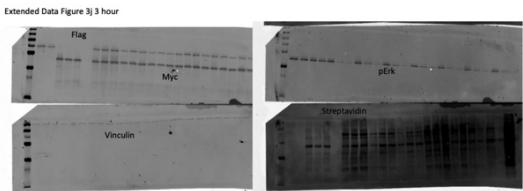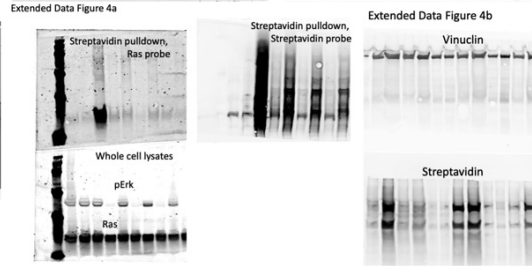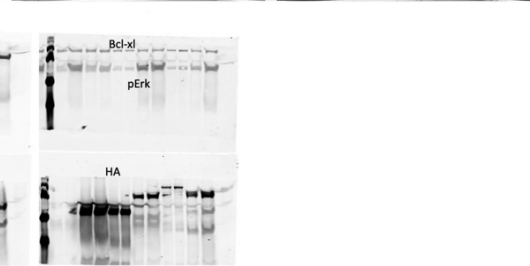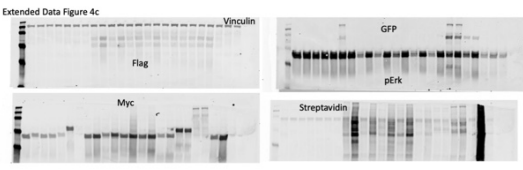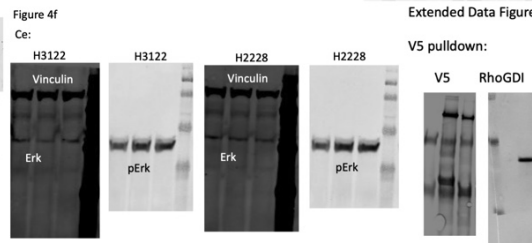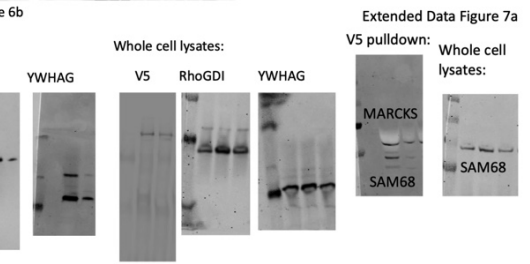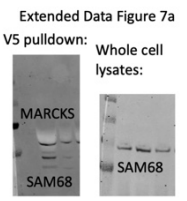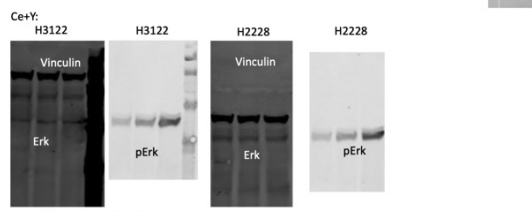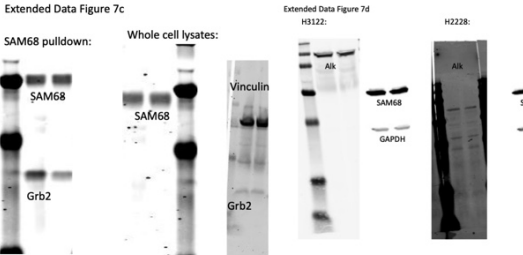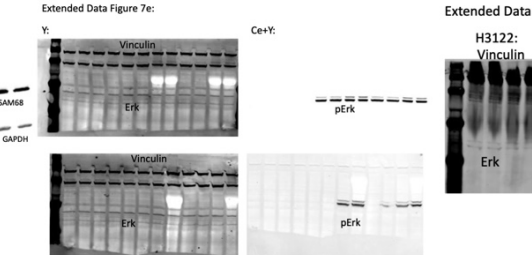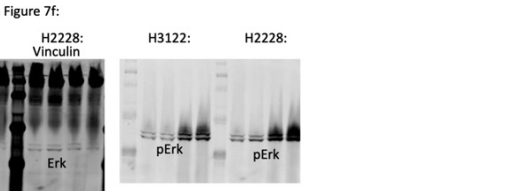

Supplement: 41587_2023_2107_MOESM1_ESM.pdf [file 41587_2023_2107_MOESM1_ESM.pdf]
